# Supplementary material for: Optimizing biomarkers for accurate ependymoma diagnosis, prognostication, and stratification within International Clinical Trials: A BIOMECA study
Source: PubMed Central journal article supplement — Neuro Oncol. 2023 Mar 14;25(10):1871–82. doi: 10.1093/neuonc/noad055 (PMC10547510; doi:10.1093/neuonc/noad055), 2023-03-14
Supplement: noad055_suppl_supplementary_figure_3.pdf [file noad055_suppl_supplementary_figure_3.pdf]

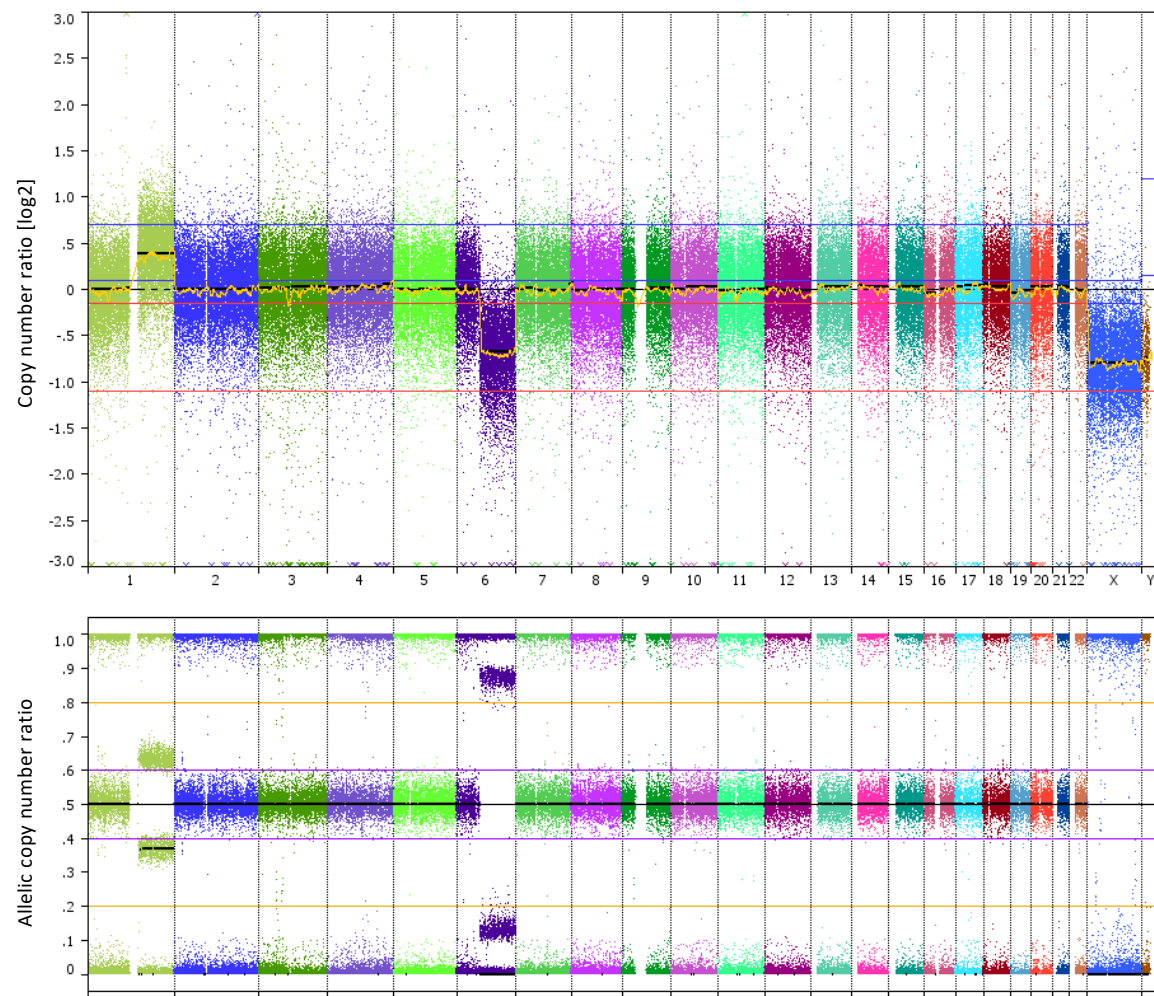

Suppl. Fig. 3: 1q gain/6q loss co-occurrence by MIP
