# Supplementary material for: Optimizing biomarkers for accurate ependymoma diagnosis, prognostication, and stratification within International Clinical Trials: A BIOMECA study
Source: PubMed Central journal article supplement — Neuro Oncol. 2023 Mar 14;25(10):1871–82. doi: 10.1093/neuonc/noad055 (PMC10547510; doi:10.1093/neuonc/noad055), 2023-03-14
Supplement: noad055_suppl_supplementary_table_1.pdf [file noad055_suppl_supplementary_table_1.pdf]

| Marker               | Methodology                  | Centre/s      |               |                 |
|----------------------|------------------------------|---------------|---------------|-----------------|
|                      |                              | 1             | 2             | 3               |
| 1q gain              | FISH                         | CBTRC, UK     | CHSA, France  |                 |
|                      | MLPA/MIP                     | CBTRC, UK     | BONN, Germany |                 |
|                      | EPIC 850K methylation array  | CBTRC, UK     | DKFZ, Germany |                 |
| <i>ZFTA</i> - fusion | RT-PCR/Sequencing/Nanostring | BONN, Germany | COMO, Italy   |                 |
|                      | IHC                          | BONN, Germany | COMO, Italy   |                 |
|                      | FISH                         | CHSA, France  |               |                 |
| <i>YAP1</i> - fusion | RT-PCR/sequencing            | BONN, Germany | COMO, Italy   |                 |
|                      | IHC                          | BONN, Germany | COMO, Italy   |                 |
|                      | FISH                         | CHSA, France  |               |                 |
| CDKN2A               | MLPA/MIP                     | CBTRC, UK     | BONN, Germany |                 |
| H3K27me3             | IHC                          | CBTRC, UK     | BONN, Germany | VIENNA, Austria |
| Tenascin C (TNC)     | IHC                          | CHSA, France  | COMO, Italy   |                 |

**Supp. Tbl 1:** BIOMECA centre and methodology
