# Supplementary material for: Optimizing biomarkers for accurate ependymoma diagnosis, prognostication, and stratification within International Clinical Trials: A BIOMECA study
Source: PubMed Central journal article supplement — Neuro Oncol. 2023 Mar 14;25(10):1871–82. doi: 10.1093/neuonc/noad055 (PMC10547510; doi:10.1093/neuonc/noad055), 2023-03-14
Supplement: noad055_suppl_supplementary_table_3.pdf [file noad055_suppl_supplementary_table_3.pdf]

|          | ST-YAP1 | ST-ZFTA                                                                         | PFA                                                                                    | PFB                              | Other                                                                |
|----------|---------|---------------------------------------------------------------------------------|----------------------------------------------------------------------------------------|----------------------------------|----------------------------------------------------------------------|
| Group    | ST-YAP1 | ST-ZFTA                                                                         | PFA                                                                                    | PFB/PF-SE                        | SP-MPE<br>ST-PLAGL1<br>Neuroepithelial<br>tumor with<br>PATZ1-fusion |
| Subgroup |         | ST-ZFTA<br>ST-ZFTA alt.,<br>Cluster 2                                           | PFA-1<br>PFA-2                                                                         | PFB 1 - 3<br>PFB-4               |                                                                      |
| Subtype  |         | ST-ZFTA<br>ST-ZFTA, Cl. 1<br>ST-ZFTA, Cl. 2<br>ST-ZFTA, Cl. 3<br>ST-ZFTA, Cl. 4 | PFA-1a<br>PFA-1b<br>PFA-1c<br>PFA-1d<br>PFA-1e<br>PFA-1f<br>PFA-2a<br>PFA-2b<br>PFA-2c | PFB-1<br>PFB-2<br>PFB-3<br>PFB-4 |                                                                      |

**Suppl. Tbl. 3:** A layered diagnostic approach to molecular ependymoma classification
