# Supplementary material for: Optimizing biomarkers for accurate ependymoma diagnosis, prognostication, and stratification within International Clinical Trials: A BIOMECA study
Source: PubMed Central journal article supplement — Neuro Oncol. 2023 Mar 14;25(10):1871–82. doi: 10.1093/neuonc/noad055 (PMC10547510; doi:10.1093/neuonc/noad055), 2023-03-14
Supplement: noad055_suppl_supplementary_table_4.pdf [file noad055_suppl_supplementary_table_4.pdf]

| Anatomical Location      | Molecular Classification (DNA Methylation Array)                   | n =        |
|--------------------------|--------------------------------------------------------------------|------------|
| Posterior Fossa (n= 111) | Posterior fossa ependymoma group A                                 | 95         |
|                          | Posterior fossa ependymoma group B & posterior fossa subependymoma | 8          |
|                          | Score <0.9                                                         | 8          |
| Supratentorial (n= 32)   | Supratentorial ependymoma, ZFTA-fused                              | 18         |
|                          | Supratentorial ependymoma, ZFTA alt., Cluster 2                    | 4          |
|                          | Supratentorial ependymoma, YAP1-fused                              | 1          |
|                          | Supratentorial ependymoma [non-defined type]; ST-PLAGL1            | 2          |
|                          | Posterior fossa ependymoma group A                                 | 1          |
|                          | Posterior fossa ependymoma group B & posterior fossa subependymoma | 2          |
|                          | Score <0.9                                                         | 3          |
|                          | Not classifiable                                                   | 1          |
| Spinal (n= 4)            | Myxopapillary ependymoma                                           | 2          |
|                          | Score <0.9                                                         | 1          |
|                          | Not classifiable                                                   | 1          |
| <i>Total n =</i>         |                                                                    | <i>147</i> |

**Supp. Tbl. 4:** Anatomical location and corresponding molecular classification.
